# Supplementary material for: Anti-Trypanosoma cruzi Properties of Sesquiterpene Lactones Isolated from Stevia spp.: In Vitro and In Silico Studies
Source: MDPI journal article supplement (doi:10.3390/pharmaceutics15020647), 2023-02-15
Supplement: s1 [file s1]

## Article

# Supplementary materials: Anti-*Trypanosoma cruzi* Properties of Sesquiterpene Lactones Isolated from *Stevia* spp.: In Vitro and In Silico Studies

Jimena Borgo <sup>1,2</sup>, Orlando G. Elso <sup>2,3</sup>, Jessica Gomez <sup>4</sup>, Mauro Coll <sup>4</sup>, Cesar A. N. Catalán <sup>5</sup>, Juan Mucci <sup>6</sup>, Guzmán Alvarez <sup>7</sup>, Lía M. Randall <sup>7</sup>, Patricia Barrera <sup>4</sup>, Emilio L. Malchiodi <sup>8,9</sup>, Augusto E. Bivona <sup>8,9,†</sup>, María Florencia Martini <sup>1,10,†</sup> and Valeria P. Sülsen <sup>1,2,\*,†</sup>

- <sup>1</sup> Instituto de Química y Metabolismo del Fármaco (IQUIMEFA), CONICET-Universidad de Buenos Aires, Junín 956, piso 2, Buenos Aires C1113AAD, Argentina
  - <sup>2</sup> Cátedra de Farmacognosia, Facultad de Farmacia y Bioquímica, Universidad de Buenos Aires, Junín 956, piso 2, Buenos Aires C1113AAD, Argentina
  - <sup>3</sup> Unidad de Microanálisis y Métodos Físicos Aplicados a Química Orgánica (UMYMFOR), Facultad de Ciencias Exactas y Naturales, CONICET-Universidad de Buenos Aires, Ciudad Universitaria, Pabellón 2, piso 3, Buenos Aires C1428EGA, Argentina;
  - <sup>4</sup> Facultad de Ciencias Médicas, Instituto de Histología y Embriología “Dr. Mario H. Burgos” (IHEM), Universidad Nacional de Cuyo-CONICET, CC 56, Mendoza 5500, Argentina
  - <sup>5</sup> Instituto de Química Orgánica, Facultad de Bioquímica, Química y Farmacia, Universidad Nacional de Tucumán, Ayacucho 471, San Miguel de Tucumán, Tucumán T4000INI, Argentina
  - <sup>6</sup> Instituto de Investigaciones Biotecnológicas, Universidad Nacional de San Martín-CONICET, Buenos Aires 5500, Argentina
  - <sup>7</sup> Laboratorio de Moléculas Bioactivas, Departamento de Ciencias Biológicas, CENUR Litoral Norte, Universidad de la República, Paysandú 60000, Uruguay
  - <sup>8</sup> Cátedra de Inmunología, Facultad de Farmacia y Bioquímica, Universidad de Buenos Aires, Junín 956, piso 4, Buenos Aires C1113AAD, Argentina
  - <sup>9</sup> Instituto de Estudios de la Inmunidad Humoral (IDEHU), CONICET-Universidad de Buenos Aires, Junín 956, piso 4, Buenos Aires C1113AAD, Argentina
  - <sup>10</sup> Cátedra de Química Medicinal, Facultad de Farmacia y Bioquímica, Universidad de Buenos Aires, Junín 956, Planta Principal, Buenos Aires C1113AAD, Argentina
- \* Correspondence: vsulsen@ffyb.uba.ar; Tel.: +54-11-5287-4272
- † The work was co-directed by the three authors.

**Citation:** Borgo, J.; Elso, O.G.; Gomez, J.; Coll, M.; Catalán, C.A.N.; Mucci, J.; Alvarez, G.; Randall, L.M.; Barrera, P.; Malchiodi, E.L.; et al. Anti-*Trypanosoma cruzi* Properties of Sesquiterpene Lactones Isolated from *Stevia* spp.: In Vitro and In Silico Studies. *Pharmaceutics* **2023**, *15*, 647. <https://doi.org/10.3390/pharmaceutics15020647>

Academic Editor: Maria João Castro Gouveia

Received: 20 December 2022

Revised: 3 February 2023

Accepted: 7 February 2023

Published: 15 February 2023

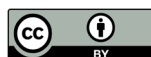

**Copyright:** © 2023 by the authors. Licensee MDPI, Basel, Switzerland. This article is an open access article distributed under the terms and conditions of the Creative Commons Attribution (CC BY) license (<https://creativecommons.org/licenses/by/4.0/>).

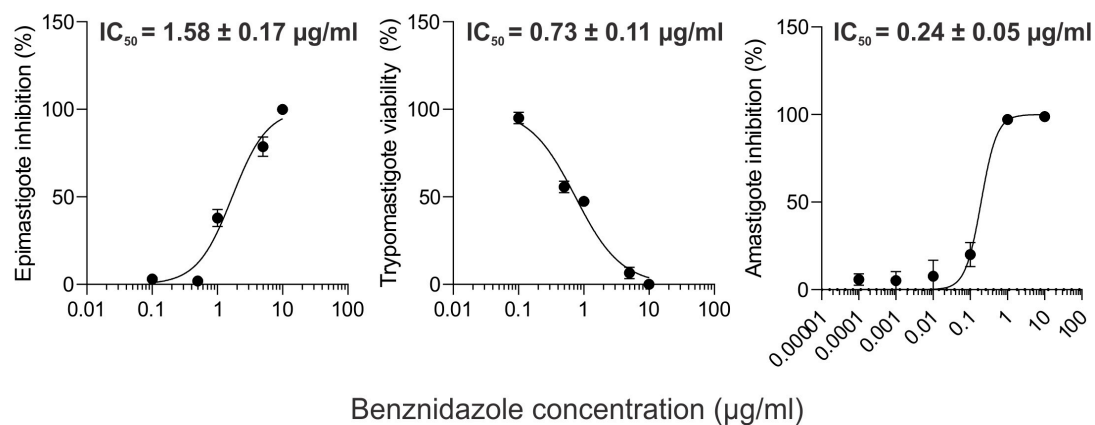

Figure S1. Trypanocidal activity of the reference drug benznidazole determined by *in vitro* assays against epimastigotes, trypomastigotes and amastigotes of *T. cruzi*.
